# Supplementary material for: Patient Satisfaction and Experience with CT-P17 Following Transition from Reference Adalimumab or Another Adalimumab Biosimilar: Results from the Real-World YU-MATTER Study
Source: Springer Nature journal article supplement (doi:10.1007/s40259-024-00681-2), 2024-09-25
Supplement: MOESM1 [file 40259_2024_681_MOESM1_ESM.pdf]

**Patient Satisfaction and Experience with CT-P17 Following Transition from Reference Adalimumab or Another Adalimumab Biosimilar: Results from the Real-World YU-MATTER Study**

**Journal**

*BioDrugs*

**Authors**

Guillaume Bouguen, Laure Gossec, Vered Abitbol, Eric Senbel, Guillaume Bonnaud, Xavier Roblin, Yoram Bouhnik, Stéphane Nancey, Nicolas Mathieu, Jérôme Filippi, Lucine Vuitton, Stéphane Nahon, Azeddine Dellal, Alice Denis, Lucile Foulley, Caroline Habauzit, Salim Benkhalifa, Hubert Marotte

**Corresponding Author**

Caroline Habauzit

Celltrion Healthcare France S.A.S.

9-15 rue Rouget de Lisle

Issy-les-Moulineaux, 92130, France

Email: [Caroline.Habauzit@celltrionhc.com](mailto:Caroline.Habauzit@celltrionhc.com)

**Supplementary Fig. 1** Survey item used to evaluate overall patient satisfaction with CT-P17 in the real-world YU-MATTER study

**Satisfaction with the YUFLYMA® injection**

*(sat-inj)* What is your global satisfaction with the YUFLYMA® injection?

Completely dissatisfied    Mostly dissatisfied    Somewhat dissatisfied    Neither satisfied or dissatisfied    Somewhat satisfied    Mostly satisfied    Completely satisfied

The image shows a survey interface with a dark blue header containing the title 'Satisfaction with the YUFLYMA® injection'. Below the header is a light grey box with the question '(sat-inj) What is your global satisfaction with the YUFLYMA® injection?'. Underneath the question is a horizontal Likert scale with a yellow bar and a white slider knob. The scale has seven points labeled from left to right: 'Completely dissatisfied', 'Mostly dissatisfied', 'Somewhat dissatisfied', 'Neither satisfied or dissatisfied', 'Somewhat satisfied', 'Mostly satisfied', and 'Completely satisfied'.

Treatment satisfaction question and 7-point Likert scale were translated from the original French version; YUFLYMA® refers to CT-P17.

**Supplementary Table 1** Survey items used to evaluate patient expectations, perceptions, and tolerance in the real-world YU-MATTER study

| Questionnaire item                                                          | Response options                                                                                                                                                                                                 |
|-----------------------------------------------------------------------------|------------------------------------------------------------------------------------------------------------------------------------------------------------------------------------------------------------------|
| <b>Expectations of switching to CT-P17 (relative to previous treatment)</b> |                                                                                                                                                                                                                  |
| Expected ease of use with CT-P17                                            | 7-point Likert scale (significantly less easy, much less easy, a little less easy, same level of ease, a little easier, much easier, significantly easier)                                                       |
| Expected comfort of use with CT-P17                                         | 7-point Likert scale (significantly less comfortable, much less comfortable, a little less comfortable, same level of comfort, a little more comfortable, much more comfortable, significantly more comfortable) |
| Expected pain at the injection site with CT-P17                             | 7-point Likert scale (significantly less painful, much less painful, a little less painful, same level of pain, a little more painful, much more painful, significantly more painful)                            |
| <b>Perceptions of the shared medical decision to switch to CT-P17</b>       |                                                                                                                                                                                                                  |
| Information received about the treatment                                    | 5-point Likert scales (strongly agree, agree, uncertain, disagree, strongly disagree)                                                                                                                            |
| Understanding the reason for the switch                                     |                                                                                                                                                                                                                  |
| Involvement in the decision to switch                                       |                                                                                                                                                                                                                  |
| Treatment preferences were taken into account                               |                                                                                                                                                                                                                  |
| Felt listened to by the physician                                           |                                                                                                                                                                                                                  |
| <b>Tolerance at the injection site</b>                                      |                                                                                                                                                                                                                  |
| Pain                                                                        | 0–10 NRS (0 = no pain, 10 = worst pain imaginable)                                                                                                                                                               |
| Redness                                                                     | 4-point Likert scale (absent, mild, moderate, severe)                                                                                                                                                            |
| Itching                                                                     | 0–10 NRS (0 = no itching, 10 = very severe itching)                                                                                                                                                              |
| Hematoma                                                                    | 3-point Likert scale (no hematoma, small hematoma [ $<1 \text{ cm}^2$ ], large hematoma [ $>1 \text{ cm}^2$ ])                                                                                                   |

NRS, numeric rating scale

**Supplementary Table 2** Patient expectations of switching to CT-P17 relative to previous adalimumab treatment

|                                                                      | Total analysis population<br><i>N</i> = 232 | Inflammatory disease           |                                | Previous treatment      |                            | Presence of citrate                              |                                                 |
|----------------------------------------------------------------------|---------------------------------------------|--------------------------------|--------------------------------|-------------------------|----------------------------|--------------------------------------------------|-------------------------------------------------|
|                                                                      |                                             | IBD subgroup<br><i>n</i> = 167 | CIRD subgroup<br><i>n</i> = 65 | R-ADA<br><i>n</i> = 113 | ADA-BioS<br><i>n</i> = 119 | Previous citrate-free ADA-BioS<br><i>n</i> = 187 | Previous ADA-BioS with citrate<br><i>n</i> = 45 |
| <b>Expected ease of use with CT-P17, <i>n</i> (%)</b>                |                                             |                                |                                |                         |                            |                                                  |                                                 |
| Significantly easier                                                 | 33 (14.2)                                   | 22 (13.2)                      | 11 (16.9)                      | 13 (11.5)               | 20 (16.8)                  | 23 (12.3)                                        | 10 (22.2)                                       |
| Much easier                                                          | 36 (15.5)                                   | 20 (12.0)                      | 16 (24.6)                      | 13 (11.5)               | 23 (19.3)                  | 24 (12.8)                                        | 12 (26.7)                                       |
| A little easier                                                      | 53 (22.8)                                   | 38 (22.8)                      | 15 (23.1)                      | 22 (19.5)               | 31 (26.1)                  | 39 (20.9)                                        | 14 (31.1)                                       |
| Same level of ease                                                   | 102 (44.0)                                  | 82 (49.1)                      | 20 (30.8)                      | 60 (53.1)               | 42 (35.3)                  | 93 (49.7)                                        | 9 (20.0)                                        |
| A little less easy                                                   | 1 (0.4)                                     | 1 (0.6)                        | 0                              | 1 (0.9)                 | 0                          | 1 (0.5)                                          | 0                                               |
| Much less easy                                                       | 4 (1.7)                                     | 2 (1.2)                        | 2 (3.1)                        | 2 (1.8)                 | 2 (1.7)                    | 4 (2.1)                                          | 0                                               |
| Significantly less easy                                              | 3 (1.3)                                     | 2 (1.2)                        | 1 (1.5)                        | 2 (1.8)                 | 1 (0.8)                    | 3 (1.6)                                          | 0                                               |
| <b>Expected comfort of use with CT-P17, <i>n</i> (%)</b>             |                                             |                                |                                |                         |                            |                                                  |                                                 |
| Significantly more comfortable                                       | 31 (13.4)                                   | 23 (13.8)                      | 8 (12.3)                       | 14 (12.4)               | 17 (14.3)                  | 22 (11.8)                                        | 9 (20.0)                                        |
| Much more comfortable                                                | 42 (18.1)                                   | 23 (13.8)                      | 19 (29.2)                      | 15 (13.3)               | 27 (22.7)                  | 32 (17.1)                                        | 10 (22.2)                                       |
| A little more comfortable                                            | 52 (22.4)                                   | 39 (23.4)                      | 13 (20.0)                      | 27 (23.9)               | 25 (21.0)                  | 40 (21.4)                                        | 12 (26.7)                                       |
| Same level of comfort                                                | 101 (43.5)                                  | 79 (47.3)                      | 22 (33.8)                      | 53 (46.9)               | 48 (40.3)                  | 87 (46.5)                                        | 14 (31.1)                                       |
| A little less comfortable                                            | 1 (0.4)                                     | 0                              | 1 (1.5)                        | 1 (0.9)                 | 0                          | 1 (0.5)                                          | 0                                               |
| Much less comfortable                                                | 4 (1.7)                                     | 2 (1.2)                        | 2 (3.1)                        | 2 (1.8)                 | 2 (1.7)                    | 4 (2.1)                                          | 0                                               |
| Significantly less comfortable                                       | 1 (0.4)                                     | 1 (0.6)                        | 0                              | 1 (0.9)                 | 0                          | 1 (0.5)                                          | 0                                               |
| <b>Expected pain at the injection site with CT-P17, <i>n</i> (%)</b> |                                             |                                |                                |                         |                            |                                                  |                                                 |
| Significantly more painful                                           | 9 (3.9)                                     | 7 (4.2)                        | 2 (3.1)                        | 6 (5.3)                 | 3 (2.5)                    | 7 (3.7)                                          | 2 (4.4)                                         |
| Much more painful                                                    | 4 (1.7)                                     | 1 (0.6)                        | 3 (4.6)                        | 0                       | 4 (3.4)                    | 2 (1.1)                                          | 2 (4.4)                                         |
| A little more painful                                                | 3 (1.3)                                     | 3 (1.8)                        | 0                              | 2 (1.8)                 | 1 (0.8)                    | 2 (1.1)                                          | 1 (2.2)                                         |
| Same level of pain                                                   | 63 (27.2)                                   | 55 (32.9)                      | 8 (12.3)                       | 43 (38.1)               | 20 (16.8)                  | 60 (32.1)                                        | 3 (6.7)                                         |
| A little less painful                                                | 88 (37.9)                                   | 57 (34.1)                      | 31 (47.7)                      | 40 (35.4)               | 48 (40.3)                  | 73 (39.0)                                        | 15 (33.3)                                       |

|                            |           |           |           |           |           |           |           |
|----------------------------|-----------|-----------|-----------|-----------|-----------|-----------|-----------|
| Much less painful          | 32 (13.8) | 23 (13.8) | 9 (13.8)  | 10 (8.8)  | 22 (18.5) | 22 (11.8) | 10 (22.2) |
| Significantly less painful | 33 (14.2) | 21 (12.6) | 12 (18.5) | 12 (10.6) | 21 (17.6) | 21 (11.2) | 12 (26.7) |

---

ADA-BioS, adalimumab biosimilar; CIRD, chronic inflammatory rheumatic disease; IBD, inflammatory bowel disease; R-ADA, reference adalimumab

**Supplementary Table 3** Factors associated with increased treatment satisfaction 3 months after switching to CT-P17 (univariate analyses)

| <b>Explanatory variables</b>                                                                             | <b>Comparison</b>                          | <b>OR (95% CI)</b>         | <b>p value</b> |
|----------------------------------------------------------------------------------------------------------|--------------------------------------------|----------------------------|----------------|
| Age                                                                                                      | 1 year                                     | 1.012 (0.985–1.038)        | 0.3897         |
| Sex                                                                                                      | Male vs. female                            | 0.856 (0.383–1.913)        | 0.7047         |
| Pathology                                                                                                | IBD vs. CIRD                               | 0.799 (0.326–1.957)        | 0.6237         |
| <b>BMI</b>                                                                                               | <b>≥25 vs. &lt;25 kg/m<sup>2</sup></b>     | <b>2.373 (1.009–5.582)</b> | <b>0.0476</b>  |
| Disease activity                                                                                         | Non-active vs. active disease              | 1.140 (0.401–3.248)        | 0.8055         |
| Disease duration                                                                                         | 1 year                                     | 0.998 (0.957–1.040)        | 0.9175         |
| <b>Previous adalimumab treatment</b>                                                                     | <b>ADA-BioS vs. R-ADA</b>                  | <b>3.440 (1.385–8.543)</b> | <b>0.0078</b>  |
| Number of treatment switches                                                                             | ≥2 vs. 1                                   | 1.828 (0.760–4.396)        | 0.1779         |
| Change in device type                                                                                    | Yes vs. no                                 | 2.116 (0.702–6.379)        | 0.1831         |
| Cumulative duration of previous adalimumab treatment                                                     | 1 month                                    | 0.994 (0.984–1.0040)       | 0.2666         |
| At the time of the decision to change treatment, I have all the information about the treatment I needed | Agree vs. uncertain/disagree               | 2.619 (0.586–11.695)       | 0.2073         |
| I understand why my treatment was changed                                                                | Agree vs. uncertain/disagree               | 1.186 (0.419–3.355)        | 0.7480         |
| I felt I was involved in the decision to change my treatment                                             | Agree vs. uncertain/disagree               | 1.379 (0.524–3.626)        | 0.5151         |
| My treatment preferences were taken into account by my doctor                                            | Agree vs. uncertain/disagree               | 1.547 (0.502–4.767)        | 0.4475         |
| I felt listened to by my doctor                                                                          | Agree vs. uncertain/disagree               | 1.250 (0.347–4.506)        | 0.7331         |
| Expected ease of use with CT-P17                                                                         | Easier vs. same/less easy                  | 1.140 (0.510–2.547)        | 0.7502         |
| Expected comfort of use with CT-P17                                                                      | More comfortable vs. same/less comfortable | 0.917 (0.411–2.046)        | 0.8318         |
| Expected pain at the injection site with CT-P17                                                          | Less painful vs. same/more painful         | 0.908 (0.392–2.103)        | 0.8225         |
| Redness at the injection site under previous adalimumab                                                  | Mild vs. absent                            | 0.569 (0.205–1.575)        | 0.3216         |
|                                                                                                          | Moderate vs. absent                        | 0.966 (0.317–2.937)        |                |
|                                                                                                          | Severe vs. absent                          | 2.607 (0.582–11.676)       |                |
| Hematoma at the injection site under previous adalimumab                                                 | Large (>1 cm <sup>2</sup> ) vs. none       | 1.343 (0.267–6.745)        | 0.4042         |
|                                                                                                          | Small (<1 cm <sup>2</sup> ) vs. none       | 1.778 (0.769–4.110)        |                |
| <b>Pain at the injection site under previous adalimumab</b>                                              | <b>1 unit</b>                              | <b>1.307 (1.111–1.538)</b> | <b>0.0012</b>  |
| Itching at the injection site under previous adalimumab                                                  | 1 unit                                     | 1.109 (0.956–1.288)        | 0.1719         |
| Training courses                                                                                         | Yes vs. no                                 | 1.017 (0.277–3.725)        | 0.9802         |
| HLS-EU-Q16 total score                                                                                   | 1 unit                                     | 1.012 (0.950–1.078)        | 0.7148         |
| BMQ necessity subscore                                                                                   | 1 unit                                     | 1.061 (0.931–1.209)        | 0.3730         |
| BMQ concern subscore                                                                                     | 1 unit                                     | 1.009 (0.907–1.121)        | 0.8742         |

|                    |        |                     |        |
|--------------------|--------|---------------------|--------|
| BMQ-Specific score | 1 unit | 1.018 (0.940–1.101) | 0.6627 |
|--------------------|--------|---------------------|--------|

---

ADA-BioS, adalimumab biosimilar; BMI, body mass index; BMQ, Beliefs about Medicines

Questionnaire; CI, confidence interval; CIRD, chronic inflammatory rheumatic disease; HLS-EU-Q16,

Health Literacy Survey Europe – 16 questions; IBD, inflammatory bowel disease; OR, odds ratio; R-

ADA, reference adalimumab

Factors with a *p* value < 0.10 (in bold) were included in the multivariate model.
